# Supplementary material for: Phenylboronic Acid and Amino Bifunctional Modified Adsorbent for Quickly Separating Phenolic Acids from Crude Extract of Clerodendranthus spicatus and Evaluation of Their Antioxidant and Hypoglycemic Activities
Source: MDPI journal article supplement (doi:10.3390/molecules28227539), 2023-11-11
Supplement: s1 [file s1]

## Supplementary Materials

# Phenylboronic Acid and Amino Bifunctional Modified Adsorbent for Quickly Separating Phenolic Acids from Crude Extract of *Clerodendranthus spicatus* and Evaluation of Their Antioxidant and Hypoglycemic Activities

Mengqi Cheng, Qianyi Song, Xiaoyu Zhang, Pingyi Zheng, Ran Zhao, Youxin Li\*, and Haixia Chen\*

### Preparation and conditions optimization of SiO<sub>2</sub>-NH<sub>2</sub>-FPBA

The conditions including the amount of 4-FPBA input, the amount of reducing agent, the reaction time and temperature for the synthesis of SiO<sub>2</sub>-NH<sub>2</sub>-FPBA were optimized. The phenylboronic acid content was used as a criterion for judging whether the reaction was optimized or not. The determination principle of the boronic acid group is that boronic acid can bind specifically with cis-diols group. Catechol has a cis-diol structure and has a maximum absorption wavelength at 275 nm, which can be used for quantitative calculations. In detail, 0.35 mg/mL catechol solution was prepared with 1/15 mol/L pH 8.5 NaH<sub>2</sub>PO<sub>4</sub>-Na<sub>2</sub>HPO<sub>4</sub> solution. All the processes were protected from light. SiO<sub>2</sub>-NH<sub>2</sub>-FPBA of 25 mg and 10 mL catechol solution of 0.35 mg/mL were added into centrifuge tube and shaken for 4 h. After adsorption, the supernatant solution was diluted and determined by UV-Vis spectrophotometer. A series of different concentration catechol standard solutions (0.014, 0.0175, 0.021, 0.0245, 0.028, and 0.035 mg/mL) were prepared for the standard curve. All the processes were protected from light and all experiments were in parallel three times.

The content of the phenylboronic acid group (mmol/g) was calculated by the following Eq. (1):

$$Q = \frac{(C_0 - C_1)}{m \times M} \quad (1)$$

where  $C_0$  and  $C_e$  are the initial and equilibrium catechol solution concentrations (mg/mL), respectively.  $V$  is the volume (mL) of catechol solution and  $m$  is the mass (g) of SiO<sub>2</sub>-NH<sub>2</sub>-FPBA.  $M$  is the molar mass (g/mol) of catechol.

In order to make the  $\text{SiO}_2\text{-NH}_2$  (amino content is 2.1170 mmol/g) fully react with the aldehyde group, 4-FPBA was put in molar ratios of 1:1, 1:1.5, and 1:2, and the input amounts were 2.12, 3.18, 4.24 mmol. The results were shown in the Table S1, entry 1-3. Phenylboronic acid content increased with the increase of reactants and the maximum amount of phenylboronic acid content was 0.4355 mmol/g at the ratio of 1:1.5. When the input amount of 4-FPBA was increased to 1:2, the phenylboronic acid content no longer increased significantly, and it was assumed that the amino group on the  $\text{SiO}_2\text{-NH}_2$  had completely participated in the reaction. Therefore, a ratio of 1:1.5 was chosen for the subsequent experiments.

In the investigation of the reaction time, the reaction time was set to 6, 12, and 24 h. From the Table S1, entry 2, 4-5, it was observed that the phenylboronic acid content decreased slightly by increasing the reaction time. The highest phenylboronic acid content of 0.4391 mmol/g was obtained when the reaction time was 6 h. Therefore, 6 h was chosen as the reaction time to improve the efficiency of the reaction.

The amount of input of  $\text{NaBH}_3\text{CN}$  was investigated (Table S1, entry 4, 6-7) according to the ratio of 4-FPBA: $\text{NaBH}_3\text{CN}$  as 1:1, 1:2, and 1:3. The results showed that when the input ratio was 1:2, the phenylboronic acid content was 0.4453 mmol/g. Too little reducing agent would lead to incomplete reduction and too much input would lead to waste, and 1:2 ratio was chosen.

The reaction temperatures were investigated and set at 20, 30, 40, and 50 °C (Table S1, entry 7-10). It was observed that the phenylboronic acid content decreased significantly with increasing temperature, from 0.4453 mmol/g to 0.3064 mmol/g, indicating that the reaction was not suitable for high temperature conditions. Thus, the reaction was chosen to be carried out at room temperature.

**Table S1.** Preparation and conditions optimization of SiO<sub>2</sub>-NH<sub>2</sub>-FPBA.

| Entry | 4-FPBA<br>(mmol) | NaBH <sub>3</sub> CN<br>(mmol) | Time<br>(h) | Temperature<br>(°C) | Phenylboronic acid content<br>(mmol/g) |
|-------|------------------|--------------------------------|-------------|---------------------|----------------------------------------|
| 1     | 2.12             | 9.54                           | 24          | 20                  | 0.3242                                 |
| 2     | 3.18             | 9.54                           | 24          | 20                  | 0.4355                                 |
| 3     | 4.24             | 9.54                           | 24          | 20                  | 0.4213                                 |
| 4     | 3.18             | 9.54                           | 6           | 20                  | 0.4391                                 |
| 5     | 3.18             | 9.54                           | 12          | 20                  | 0.4330                                 |
| 6     | 3.18             | 3.18                           | 6           | 20                  | 0.4334                                 |
| 7     | 3.18             | 6.36                           | 6           | 20                  | 0.4453                                 |
| 8     | 3.18             | 6.36                           | 6           | 30                  | 0.4343                                 |
| 9     | 3.18             | 6.36                           | 6           | 40                  | 0.3660                                 |
| 10    | 3.18             | 6.36                           | 6           | 50                  | 0.3064                                 |

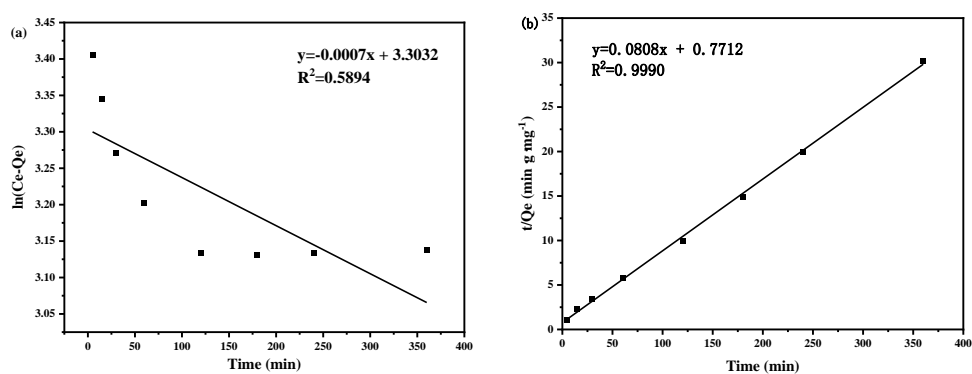**Figure S1.** (a) Fitted curves of pseudo-first-order model; (b) pseudo-second-order model of the adsorption of *C. spicatus*.

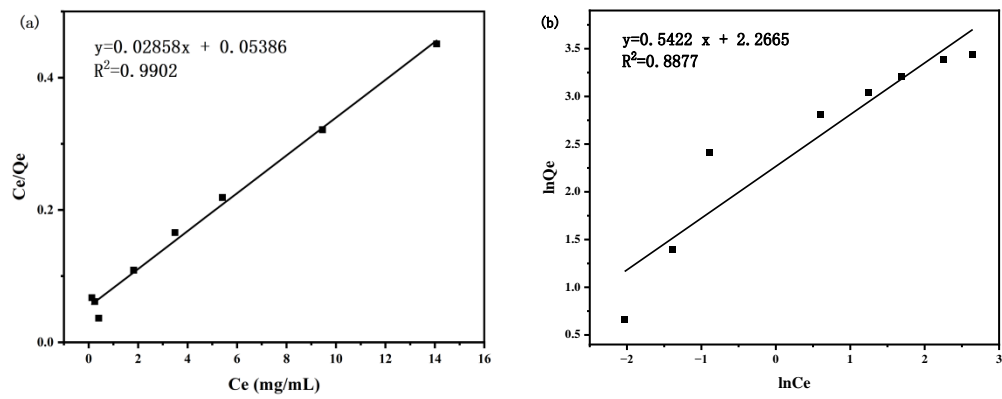

**Figure S2.** (a) Fitted curves of Langmuir model; (b) Freundlich model of the adsorption of *C.spicatus*.
